# Supplementary material
Source: HighWire-hosted journal article supplement (http://www.cmaj.ca/highwire/filestream/60105/field_highwire_adjunct_files/0/161119-res-1-at.pdf)
Supplement: 161119-res-1-at.pdf [file 161119-res-1-at.pdf]

**Appendix 1 (as supplied by the authors):** The impact of cohort exclusions on eligible individuals and person-years.

|                                            | Individuals | Person-years |
|--------------------------------------------|-------------|--------------|
| Birth year 1928-1951                       | 865,581     | 8,533,968    |
| Household income<br>\$14,000 - \$30,000    | 407,263     | 2,211,225    |
| Same plan code for<br>entire calendar year | 405,537     | 2,099,542    |
| No claims under other<br>PharmaCare plans  | 386,734     | 1,945,689    |
| Oldest person in<br>household              | 280,615     | 1,219,168    |
